# Supplementary material for: Striated myocyte structural integrity: Automated analysis of sarcomeric z-discs
Source: PubMed Central journal article supplement (PMC7075639; doi:10.1371/journal.pcbi.1007676), 2020-03-04
Supplement: pcbi.1007676.s001.pdf [file pcbi.1007676.s001.pdf]

| <b>Analysis Stage</b>         | <b>Description</b>                                                                                            | <b>Value</b>                                  |
|-------------------------------|---------------------------------------------------------------------------------------------------------------|-----------------------------------------------|
| Initialization                | Pixel to micron conversion                                                                                    | 6.22 pixels/ $\mu\text{m}$                    |
| Diffusion Filtering           | Diffusion time step                                                                                           | 0.15 s                                        |
| Diffusion Filtering           | Standard deviation of Gaussian smoothing before calculation of the image Hessian                              | 1 pixel                                       |
| Diffusion Filtering           | Standard deviation of Gaussian smoothing of the image Hessian                                                 | 1.4 pixels                                    |
| Diffusion Filtering           | Total diffusion time; Sets number of iterations                                                               | 1.5 s (11 iterations)                         |
| Top Hat Filtering             | Radius of the flat disk-shaped structuring element used for the top hat filter                                | 3 pixels ( $\sim 0.5 \mu\text{m}$ )           |
| Background Removal            | Size of blocks to break image into                                                                            | 15 pixels ( $\sim 2.5 \mu\text{m}$ )          |
| Background Removal            | Size of blocks considered noise in the condensed image                                                        | 8 pixels ( $\sim 25 \mu\text{m}$ )            |
| Background Removal            | Standard deviation of Gaussian smoothing to perform on image                                                  | 1 pixel                                       |
| Binarization                  | Size of small objects to be removed in the binarized image                                                    | 8 pixels <sup>2</sup> ( $0.2 \mu\text{m}^2$ ) |
| Skeletonization               | Minimum branch size to be included in analysis                                                                | 4 pixels                                      |
| Actin Orientation Calculation | Sigma of the Gaussian weighting used to sum the gradient moments                                              | 3 pixels                                      |
| Actin Orientation Calculation | Sigma of the derivative of Gaussian used to compute image gradients                                           | 1 pixel                                       |
| Actin Orientation Calculation | Size of Gaussian filter kernel to perform on actin image                                                      | 25 pixels                                     |
| Actin Orientation Calculation | Sigma of the Gaussian used to smooth the final orientation vector field                                       | 3 pixels                                      |
| Actin Orientation Calculation | Minimum reliability of actin orientation vectors                                                              | 0.5                                           |
| Actin Orientation Calculation | Standard deviation of Gaussian smoothing to perform on actin image                                            | 3 pixels                                      |
| Actin Guided Segmentation     | Minimum angle between $\alpha$ -actinin and local actin orientation for pixels to be considered perpendicular | 0.7 ( $> \sim 45^\circ$ )                     |
| Actin Guided Segmentation     | Size of local actin orientation                                                                               | 30 pixels ( $\sim 5 \mu\text{m}$ )            |
| Continuous Z-line Length      | Maximum angle between pixels to be considered parallel and therefore continuous                               | 0.9 ( $< \sim 25^\circ$ )                     |
