# Supplementary material for: Striated myocyte structural integrity: Automated analysis of sarcomeric z-discs
Source: PubMed Central journal article supplement (PMC7075639; doi:10.1371/journal.pcbi.1007676), 2020-03-04

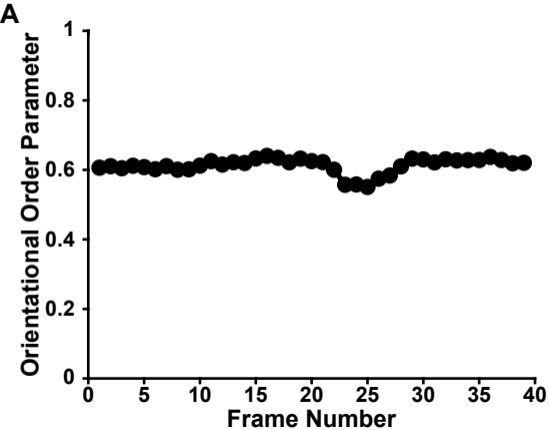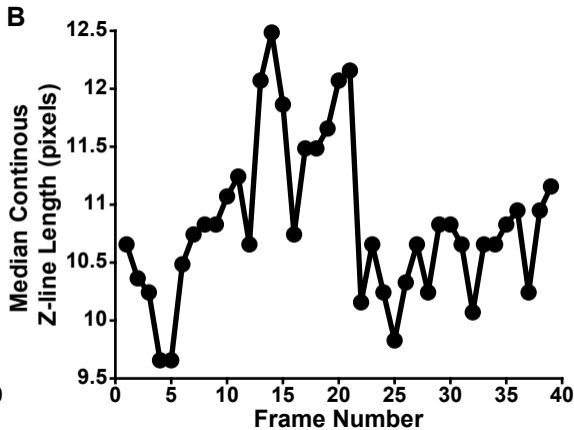

Supplement: pcbi.1007676.s007.pdf [file pcbi.1007676.s007.pdf]
